# Supplementary material for: Physical sporting activity impact on long-term BMI trajectories in adults: a longitudinal observational study
Source: Research Square preprint supplement (doi:10.21203/rs.3.rs-6999017/v1), 2025-07-18
Supplement: Supplementary file 1 [file f3df23a68aad0d1c46c05a43.docx]

**Tables**

|  | BMI | N (%) | mean | sd | median |
| --- | --- | --- | --- | --- | --- |
| Age | 18.5-29.9 | 5526 (87.2) | 46.49 | 17.22 | 47.0 |
|  | 30.0-34.9 | 629 (9.9) | 51.53 | 14.48 | 52.0 |
|  | 35.0 | 182 (2.9) | 49.38 | 14.21 | 50.0 |
| MET | 18.5-29.9 | 4674 (86.9) | 3.21 | 2.94 | 4.0 |
|  | 30.0-34.9 | 549 (10.2) | 2.34 | 2.65 | 0.0 |
|  | 35.0 | 154 (2.9) | 1.95 | 2.48 | 0.0 |
| Sport | 18.5-29.9 | 4674 (86.9) | 2.48 | 3.51 | 2.0 |
| h/w | 30.0-34.9 | 549 (10.2) | 1.95 | 3.42 | 0.0 |
|  | 35.0 | 154 (2.9) | 1.30 | 1.95 | 0.0 |

TABLE 1: Descriptive statistics of study variables by BMI-category

| type of sport | MET | % |  | % by weight category | | |
| --- | --- | --- | --- | --- | --- | --- |
|  | 18.5-29.9 | 30.0-34.9 | 35.0 |
| running | 10.5 | 10.3 |  | 11.4 | 3.8 | 1.9 |
| soccer | 8 | 4.1 |  | 4.4 | 2.4 | 0.0 |
| hockey | 8 | 0.9 |  | 0.9 | 0.7 | 0.6 |
| inline skating | 7 | 1.3 |  | 1.5 | 0.4 | 0.0 |
| swimming | 6 | 8.5 |  | 8.5 | 8.2 | 9.1 |
| dancing | 6 | 3.2 |  | 3.6 | 1.6 | 0.0 |
| gymnastics | 5 | 3.5 |  | 3.6 | 2.4 | 4.5 |
| cycling | 5.5 | 17.6 |  | 18.7 | 10.2 | 9.7 |
| fitness | 4 | 20.9 |  | 21.1 | 20.0 | 18.8 |
| golf | 3.5 | 1.6 |  | 1.7 | 1.3 | 0.6 |
| walking | 3.5 | 18.2 |  | 18.9 | 14.0 | 13.0 |
| other sport | 5 | 13.9 |  | 14.3 | 11.1 | 10.4 |

TABLE 2: Type of sport, MET scores and frequency of engaging in sporting activities for 5377 participating adults at baseline

|  | (1) | (2) | (3) | (4) |
| --- | --- | --- | --- | --- |
| (1) BMI | 1.00 |  |  |  |
| (2) MET | -0.15*** | 1.00 |  |  |
| (3) sports h/w | -0.09*** | 0.53*** | 1.00 |  |
| (4) METh/w | -0.15*** | 0.89*** | 0.79*** | 1.00 |

TABLE 3: Pearson correlations of BMI values and sport indicators

*Notes*: Variable (4) METh/w is the product of variables (2) MET and (3) hours of sport per week.

|  | coefficient | 95 %-CI | P |
| --- | --- | --- | --- |
| [Intercept] | 23.87 | 23.33,24.40 | <0.001*** |
| age | 0.05 | 0.05, 0.06 | <0.001*** |
| gender[female] | -0.39 | -0.62,-0.17 | <0.001*** |
| running | -1.15 | -1.52,-0.78 | <0.001*** |
| soccer | -0.57 | -1.14,-0.01 | 0.047* |
| hockey | -0.22 | -1.39, 0.94 | 0.708 |
| inline skating | -0.95 | -1.91, 0.01 | 0.051 |
| swimming | 0.51 | 0.11, 0.91 | 0.012* |
| gymnastics | -0.68 | -1.28,-0.08 | 0.026* |
| cycling | -0.68 | -1.00,-0.35 | <0.001*** |
| fitness | 0.26 | -0.01, 0.53 | 0.061 |
| golf | -0.30 | -1.16, 0.56 | 0.499 |
| walking | -0.32 | -0.64, 0.01 | 0.056 |
| other sport | -0.43 | -0.74,-0.11 | 0.008** |

TABLE 4: Linear Regression coefficients of age, gender, and different types of sport predicting BMI values at baseline

| Variable |  |  |  |  |  |  | part. |
| --- | --- | --- | --- | --- | --- | --- | --- |
| time () | 48.3388 |  | 2 |  | 5585.8 | <.001 *** | .0200 |
| age | 4.6057 |  | 3 |  | 6048.3 | .003 ** | .0023 |
| BMI category ( | 5.5758 |  | 2 |  | 6088.4 | .004 ** | .0018 |
| MET change (MET) | 22.0559 |  | 1 |  | 22191.7 | <.001 *** | .0010 |
| * age | 8.1260 |  | 6 |  | 5578.5 | <.001 *** | .0087 |
|  | 10.4739 |  | 4 |  | 5597.8 | <.001 *** | .0074 |
| age * | 1.1726 |  | 6 |  | 6069.9 | .318 (n.s.) | .0012 |
| MET | 8.0604 |  | 2 |  | 22283.9 | <.001 *** | .0007 |
| * age * | 2.8468 |  | 12 |  | 5578.6 | <.001 *** | .0061 |

TABLE 5: ANOVA table pertaining to the fixed effects for predicting changes in BMI. Significance testing was performed using Satterthwaite adjusted degrees of freedom.

Notes. were calculated with Satterthwaite's method; the partial gives the proportion of overall variance that is explained by the individual terms.
